# Supplementary material for: Syphilis as Re-Emerging Disease, Antibiotic Resistance, and Vulnerable Population: Global Systematic Review and Meta-Analysis
Source: MDPI journal article supplement (doi:10.3390/pathogens11121546), 2022-12-15

Table S1 Newcastle-Ottawa Scale adapted for cross-sectional studies

| Criteria                                                                                                                                                                                                                                        | Condition required to obtain a start                                                                                                                 |
|-------------------------------------------------------------------------------------------------------------------------------------------------------------------------------------------------------------------------------------------------|------------------------------------------------------------------------------------------------------------------------------------------------------|
| Selection: 1) Representative of the sample (1 start)                                                                                                                                                                                            | Truly representative of the average in the target population, random sampling/ somewhat representative in the target population. non-random sampling |
| Selection: 2) Sample size (1 start)                                                                                                                                                                                                             | Justified and satisfactory.                                                                                                                          |
| Selection: 3) Non-respondents (1 start)                                                                                                                                                                                                         | Response rate is satisfactory (>60%). T. pallidum amplification rate                                                                                 |
| Selection: 4) Ascertainment of the exposure (2 starts)*                                                                                                                                                                                         | Use of biomarkers. molecular detection.                                                                                                              |
| Compatibility: The subjects in different outcome groups are comparable, based on the study design or analysis (2 start)                                                                                                                         | Data/results adjusted to take into account relevant predictors/risk factors/confounders, e.g., age, sex, time since vaccination, etc                 |
| Outcome: 1) Assessment of the outcome (2 start)*                                                                                                                                                                                                | direct measurements using biomarkers are used. Molecular detection                                                                                   |
| Outcome: 2) Statistical test (1 start)                                                                                                                                                                                                          | The measures (if any) including confidence intervals are detailed. In this case, the proportion of syphilis and mutation resistance.                 |
| This scale has been adapted from the Newcastle-Ottawa Quality Assessment Scale for cohort studies to perform a quality assessment of cross-sectional studies for the systematic review                                                          |                                                                                                                                                      |
| *In this study, greater emphasis was given on the detection of T. pallidum and antibiotic resistance, since the aim of this work was to describe and analyze the molecular detection of syphilis and mutations of the gene 23s RNAr T. pallidum |                                                                                                                                                      |

Table S2. continuity of descriptive characteristics of eligible studies

| First author, publication year | Specimen                                    | Stage of syphilis                         |
|--------------------------------|---------------------------------------------|-------------------------------------------|
| Bourgeois G, 2021 (20)         | Lesions                                     | Primary & secondary                       |
| Mitchell SJ, 2006 (21)         | Lesions                                     | Primary & secondary                       |
| Read P, 2014 (22)              | Lesions, CSF, vitreous humor                | Primary & secondary                       |
| Fernández-Naval C, 2019 (23)   | Lesions, blood                              | Primary & secondary                       |
| Giacani L, 2018 (24)           | Lesions                                     | Primary & secondary                       |
| Nishiki S, 2020 (25)           | Lesions, CSF, blood, tissue                 | Primary & secondary                       |
| Van Damme K, 2009 (26)         | Lesions                                     | Primary & secondary                       |
| Wu H, 2012 (27)                | Lesions, CSF, blood, vitreous humor         | Primary, secondary & neurosyphilis        |
| Noda AA, 2016 (11)             | Lesions                                     | NR                                        |
| Lu H, 2015 (28)                | Lesions                                     | Primary & secondary                       |
| Chen XS, 2013 (29)             | Lesions, blood                              | Primary & secondary                       |
| Tipple C, 2011 (30)            | Lesions, blood                              | Primary & secondary                       |
| Zhu B, 2016 (31)               | Lesions                                     | Primary & secondary                       |
| Martin IE, 2009 (32)           | Lesions, blood, serum                       | Primary                                   |
| Müller EE, 2012 (33)           | Lesions                                     | Secondary                                 |
| Vrbová E, 2019 (34)            | Lesions, blood                              | Primary & congenital                      |
| Liu D, 2021 (35)               | Lesions, CSF                                | Primary, secondary & tertiary             |
| Martin IE, 2009 (36)           | Lesions, CSF, blood                         | Primary, secondary & congenital           |
| Zondang HCA, 2020 (37)         | Lesions                                     | Primary                                   |
| Katz KA, 2010 (38)             | Lesions                                     | Primary & secondary                       |
| Xiao Y, 2016 (39)              | Lesions, blood                              | Secondary                                 |
| Kanai M, 2019 (40)             | Lesions, blood                              | Primary                                   |
| Shuel M, 2018 (41)             | Lesions, CSF, blood                         | Primary, secondary & congenital           |
| Mikalová L, 2017 (42)          | Blood, CSF                                  | Primary, secondary & neurosyphilis        |
| Grillová L, 2014 (43)          | Lesions, CSF, blood, tissue                 | Primary, secondary & congenital           |
| Gallo Vaulet L, 2017 (44)      | Lesions, CSF, blood                         | Primary, secondary & congenital           |
| Martin IE, 2010 (45)           | Lesions, CSF, blood, vitreous humor         | Primary, secondary & congenital           |
| Wu BR, 2014 (46)               | CSF, serum, plasma, vitreous humor          | Primary, secondary & neurosyphilis        |
| Grillová L, 2019 (47)          | Lesions                                     | Primary                                   |
| Xiao H, 2017 (48)              | Lesions                                     | Primary & secondary                       |
| Su JR, 2012 (49)               | Lesions                                     | Primary & secondary                       |
| Flasarová M, 2012 (50)         | Lesions, CSF, blood, knee aspirate, tissue  | Primary, secondary, tertiary & congenital |
| Sanchez A, 2020 (51)           | Lesions                                     | Primary & secondary                       |
| Wu BR, 2014 (52)               | CSF, serum, plasma, vitreous humor          | Primary, secondary & neurosyphilis        |
| Khairullin R, 2016 (53)        | Lesions, blood                              | Primary & secondary                       |
| Muldoon EG, 2012 (54)          | Lesions, CSF, blood, tissue, vitreous humor | Primary, secondary & neurosyphilis        |
| Coelho EC, 2021 (55)           | Lesions                                     | Primary & secondary                       |
| Venter JME, 2021 (56)          | Lesions, blood                              | Primary & secondary                       |
| Flores JA, 2016 (57)           | Lesions, serum                              | NR                                        |
| Li Z, 2013 (58)                | Lesions                                     | Primary & secondary                       |
| Grimes M, 2012 (59)            | Blood, CSF                                  | Primary & secondary                       |

General characteristics of eligible studies NR: Not reported; CFS: cerebral spinal fluid

Figure S1 Meta-analysis of proportion global of molecular detection of syphilis.

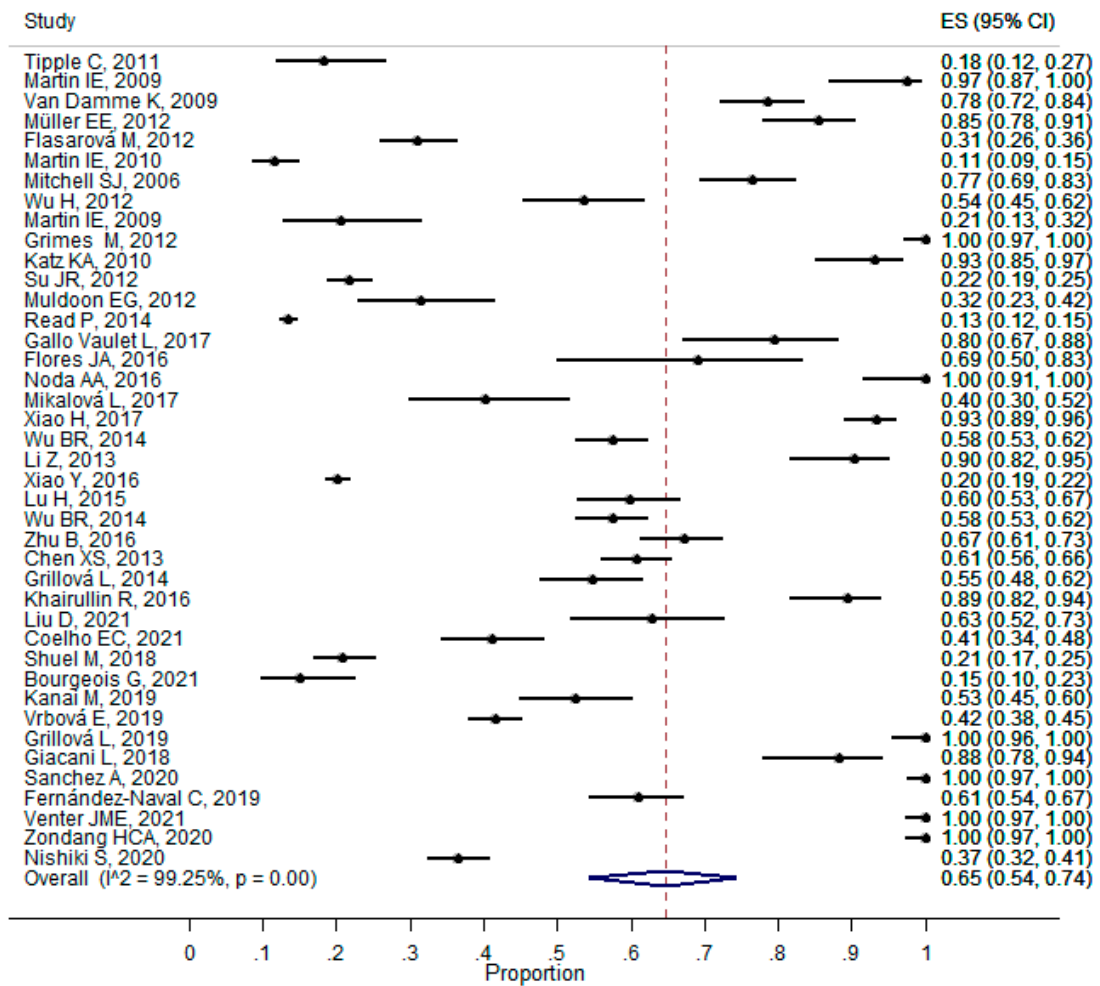

Figure S2. Meta-analysis of the proportion of A2058G mutations of the eligible studies

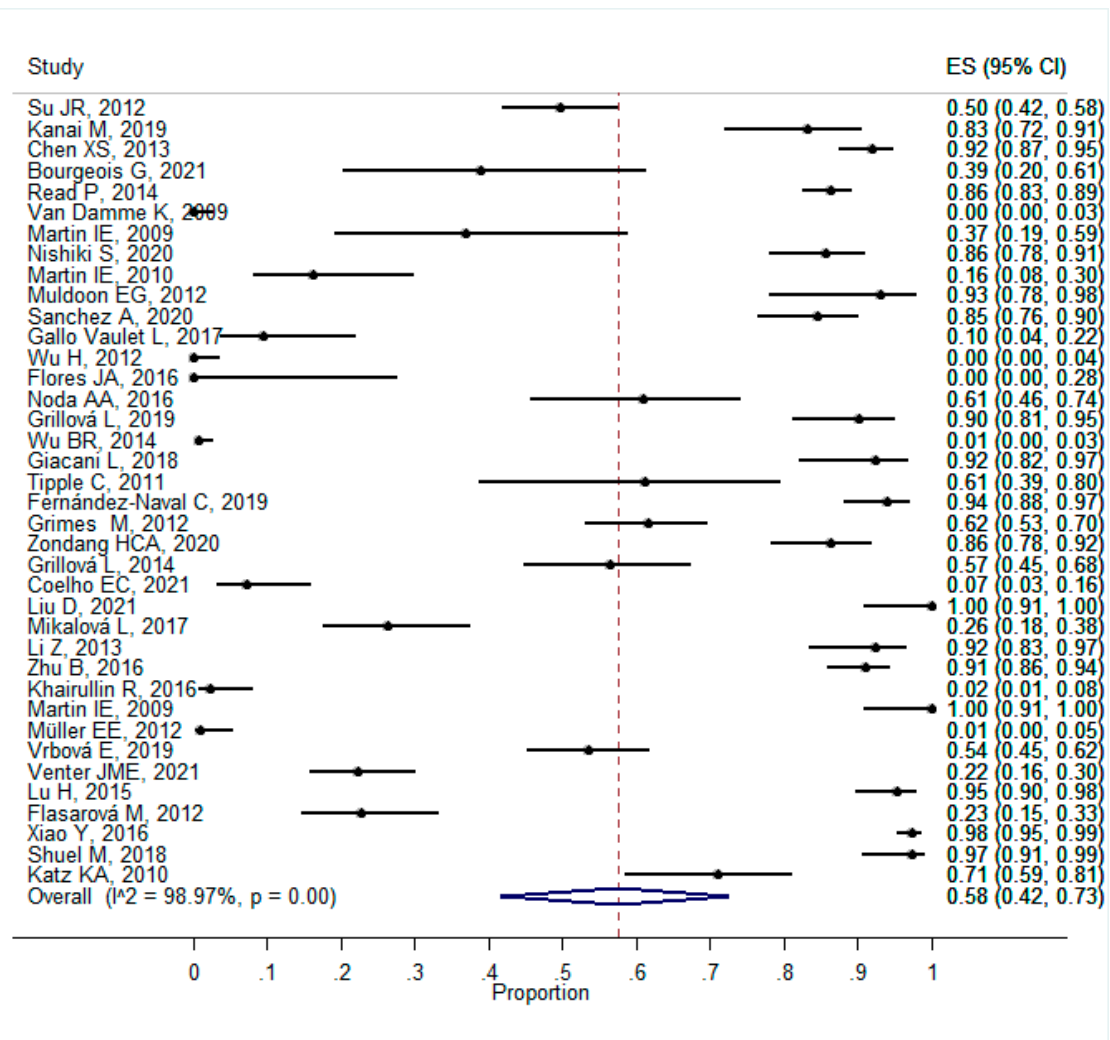

Supplement: s1 [file s1]
